# Supplementary material for: Phosphorylation of E-cadherin at threonine 790 by protein kinase Cδ reduces β-catenin binding and suppresses the function of E-cadherin
Source: PubMed Central journal article supplement (PMC5095074; doi:10.18632/oncotarget.9403), 2016-05-17
Supplement: oncotarget-07-37260-s001.pdf [file oncotarget-07-37260-s001.pdf]

## Phosphorylation of E-cadherin at threonine 790 by protein kinase C $\delta$ reduces $\beta$ -catenin binding and suppresses the function of E-cadherin

### SUPPLEMENTARY INFORMATION

#### Online supplemental information

Figure S1 shows that Gö6976, a selective inhibitor for the classical PKC isozymes, does not inhibit the phosphorylation of E-cadherin Thr790 and the scatter of MDCK cells upon HGF stimulation.

Figure S2 and S3 show larger fields for Figure 5C and Figure 6F, respectively.

### SUPPLEMENTARY FIGURES

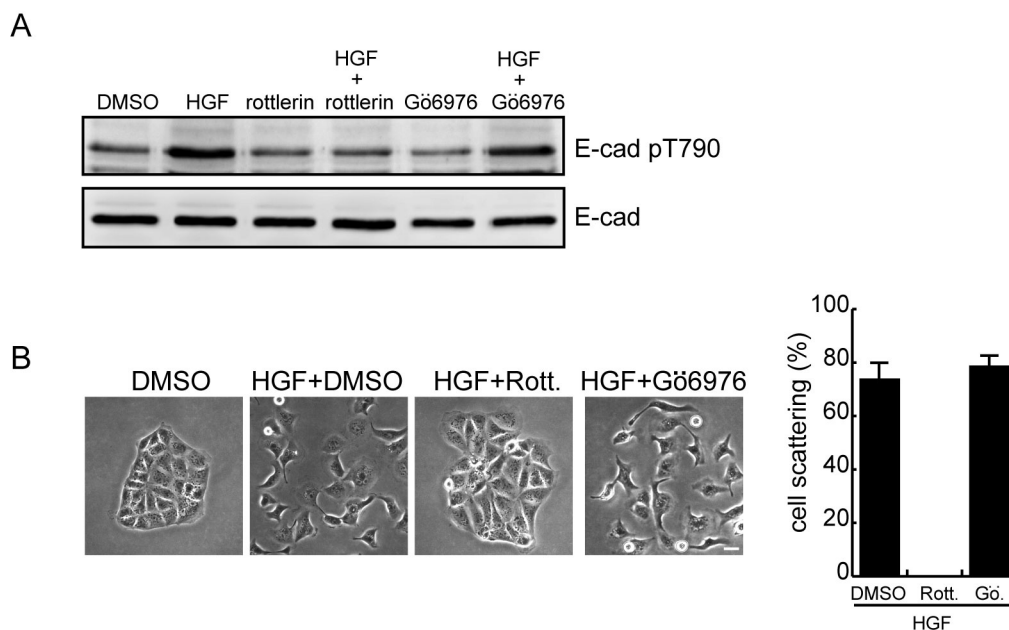

**Supplementary Figure S1: Classical PKCs are likely not involved in the phosphorylation of E-cadherin T790 and the cell scattering induced by HGF.** **A.** MDCK cells were serum-starved for 24 h and were then treated with HGF (20 ng/ml) for 15 min in the presence of rottlerin (5  $\mu$ M) or Gö6976 (1  $\mu$ M). The cell lysates were analyzed by immunoblotting with antibodies to E-cadherin and E-cadherin pT790. **B.** MDCK cells were allowed to grow as colonies and were then treated with HGF (20 ng/ml) in the presence of rottlerin (5  $\mu$ M) or Gö6976 (1  $\mu$ M). The solvent dimethyl sulphoxide (DMSO) was used as a control. Twelve hours later, the percentage of scattered colonies out of the total counted cell colonies ( $n \geq 100$ ) was determined. The values (mean  $\pm$  SD) are from three experiments. The representative micrographs were taken under a phase-contrast microscope. The scale bar represents 20  $\mu$ m.

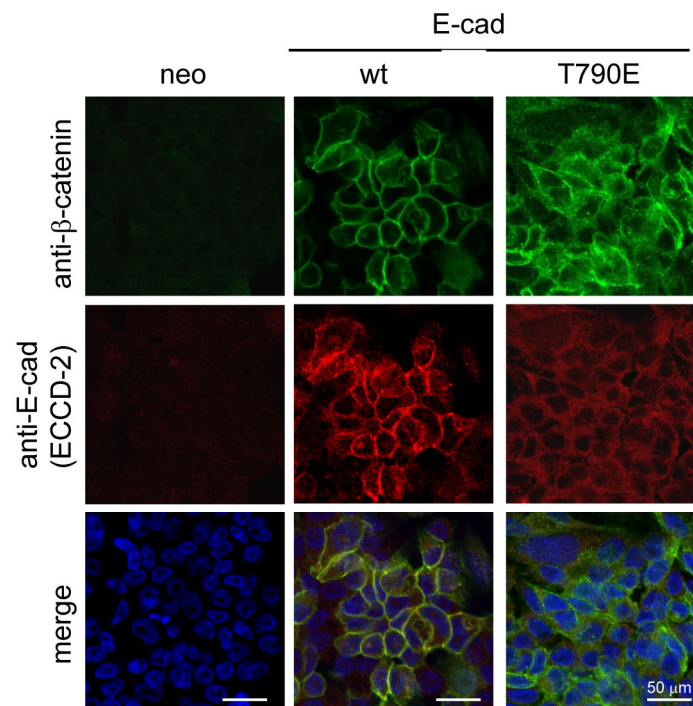

**Supplementary Figure S2:  $\beta$ -catenin is less organized at the cell-cell junctions of the CHO cells expressing the E-cadherin T790E mutant compared to those expressing the wt E-cadherin.** CHO cells stably expressing E-cadherin wt or T790E were grown to confluence and were then stained with anti- $\beta$ -catenin and anti-E-cadherin (ECCD-2). Note that  $\beta$ -catenin is less organized at the cell-cell contacts of the CHO cells expressing E-cadherin T790E. The scale bar represents 50  $\mu$ m.

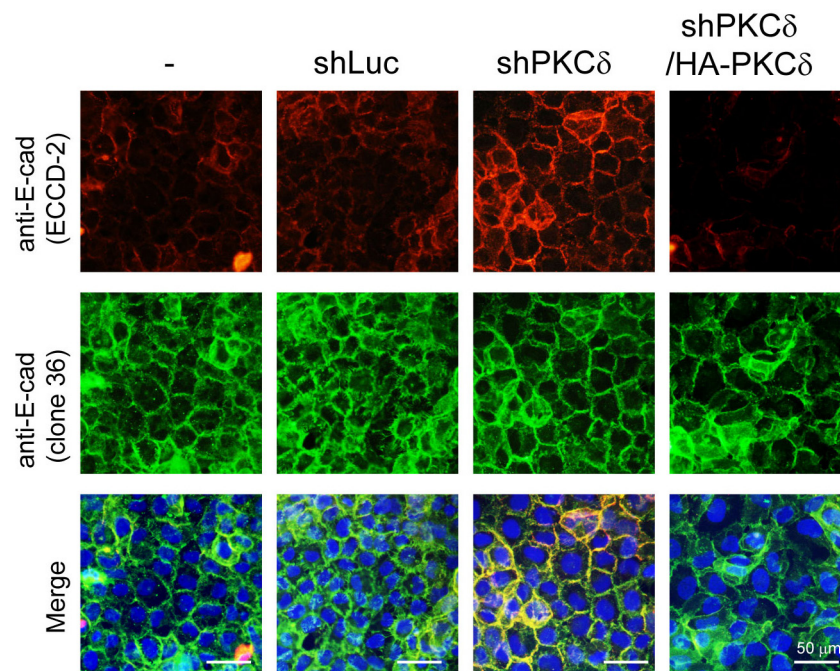

**Supplementary Figure S3: The depletion of PKC $\delta$  in the CaSki clone #1 cells enhances the homophilic interactions of E-cadherin.** CaSki #1 cells were infected with lentiviruses expressing shRNAs to PKC $\delta$  (shPKC $\delta$ ) or luciferase (shLuc) as a control. HA epitope tagged-PKC $\delta$  (HA-PKC $\delta$ ) was re-expressed in the cells whose endogenous PKC $\delta$  had been depleted. The cells were grown to confluence and were then stained with anti-E-cadherin antibodies (clone 36 and ECCD-2). The scale bar represents 50  $\mu$ m.
